# Supplementary material for: Ursodeoxycholic acid in intrahepatic cholestasis of pregnancy: a secondary analysis of the PITCHES trial
Source: PubMed Central journal article supplement (PMC8246759; doi:10.1111/1471-0528.16567), 2020-11-08
Supplement: BJO-128-1066-s003.pdf [file BJO-128-1066-s003.pdf]

**Table S1.** Maternal baseline characteristics and outcomes for 527 women included in analysis. Data are n (%), unless otherwise indicated; N is equal to the total number of participants in the group, unless otherwise indicated; <1% of observations are missing, unless indicated.

|                                                                       | <b>Ursodeoxycholic acid<br/>(n = 271)</b> | <b>Placebo<br/>(n = 256)</b> |
|-----------------------------------------------------------------------|-------------------------------------------|------------------------------|
| <b>Baseline characteristics</b>                                       |                                           |                              |
| Age, years                                                            | 30.6 (5.7)                                | 30.5 (5.2)                   |
| Ethnic group                                                          |                                           |                              |
| White                                                                 | 224 (82%)                                 | 212 (83%)                    |
| Black                                                                 | 8 (3%)                                    | 7 (3%)                       |
| Asian                                                                 | 28 (10%)                                  | 32 (13%)                     |
| Other                                                                 | 9 (3%)                                    | 5 (2%)                       |
| Not known                                                             | 2 (1%)                                    | 0 (0%)                       |
| Body-mass index at start of pregnancy (kg/m <sup>2</sup> ), mean (SD) | 27.5 (6.5)                                | 26.9 (6.2)                   |
| Previous pregnancy of ≥24 weeks' gestation                            | 162 (60%)                                 | 169 (66%)                    |
| History of intrahepatic cholestasis of pregnancy, n/N (%)             | 87/159 (55%)                              | 81/167 (49%)                 |
| Missing, n                                                            | 3                                         | 2                            |
| Gestational age (weeks), median (IQR)                                 | 34.1 (31.9–35.4)                          | 34.1 (30.7–35.6)             |
| <34 weeks                                                             | 130 (48%)                                 | 124 (48%)                    |
| 34 to <37 weeks                                                       | 125 (46%)                                 | 115 (57%)                    |
| ≥37 weeks                                                             | 16 (6%)                                   | 17 (7%)                      |
| Twin pregnancy                                                        | 17 (6%)                                   | 14 (5%)                      |
| Itch score, mean (SD)                                                 | 56.4 (24.7)                               | 59.1 (25.2)                  |
| Highest baseline serum concentration before randomisation             |                                           |                              |
| Bile acid (µmol/L), geometric mean (95% CI)                           | 27.7 (25.5–30.1)                          | 26.2 (24.1–28.3)             |
| <40 µmol/L                                                            | 209 (77%)                                 | 199 (78%)                    |
| ≥40 µmol/L                                                            | 62 (23%)                                  | 57 (22%)                     |
| Alanine transaminase, N                                               | 254                                       | 246                          |
| Alanine transaminase (U/L), geometric mean (95% CI)                   | 68.7 (59.8–78.9)                          | 56.6 (48.8–65.5)             |
| <b>Outcomes</b>                                                       |                                           |                              |
| Maximum dose of trial medication                                      |                                           |                              |
| One tablet once a day                                                 | 4 (1%)                                    | 4 (2%)                       |
| One tablet twice a day                                                | 171 (63%)                                 | 158 (62%)                    |
| One tablet three times a day                                          | 61 (23%)                                  | 62 (24%)                     |
| Two tablets twice a day                                               | 35 (13%)                                  | 32 (13%)                     |
| Mode of onset of labour                                               |                                           |                              |
| Spontaneous                                                           | 27 (10%)                                  | 40 (16%)                     |
| Induced or pre-labour rupture of membranes and stimulation            | 194 (72%)                                 | 177 (69%)                    |
| Pre-labour caesarean                                                  | 50 (18%)                                  | 39 (15%)                     |
| Estimated blood loss at delivery, mL                                  | 350 (250–600)                             | 400 (250–600)                |
| <500                                                                  | 175 (65%)                                 | 162 (63%)                    |
| ≥500 and <1000                                                        | 69 (25%)                                  | 65 (25%)                     |
| ≥1000                                                                 | 27 (10%)                                  | 29 (11%)                     |

**Table S2.** Perinatal outcomes for 558 infants born to 527 women included in analysis. Data are n (%), median (IQR), or mean (SD), unless otherwise indicated; N is equal to the total number of infants in the group, unless otherwise indicated; <1% of observations are missing, unless otherwise indicated.

|                                                              | <b>Ursodeoxycholic acid<br/>(n = 288)</b> | <b>Placebo<br/>(n = 270)</b> |
|--------------------------------------------------------------|-------------------------------------------|------------------------------|
| Perinatal death, preterm delivery or neonatal unit admission | 63 (22%)                                  | 68 (25%)                     |
| In-utero fetal death                                         | 1 (<1%)                                   | 2 (1%)                       |
| Preterm delivery                                             | 46 (16%)                                  | 49 (18%)                     |
| Known neonatal death up to 7 days after birth                | 0 (0%)                                    | 0 (0%)                       |
| Neonatal unit admission for >4 h                             | 38 (13%)                                  | 46 (17%)                     |
| Gestational age at delivery, weeks                           | 37.6 (37.1–38.1)                          | 37.4 (37.1–38.1)             |
| Birthweight, g                                               | 3100 (2795–3392)                          | 3055 (2740–3330)             |
| Mode of delivery                                             |                                           |                              |
| Spontaneous vaginal (cephalic)                               | 174 (60%)                                 | 152 (56%)                    |
| Vaginal (breech)                                             | 1 (<1%)                                   | 3 (1%)                       |
| Assisted vaginal (cephalic)                                  | 18 (6%)                                   | 32 (12%)                     |
| Pre-labour caesarean                                         | 64 (22%)                                  | 54 (20%)                     |
| Caesarean                                                    | 31 (11%)                                  | 29 (11%)                     |
| Presence of meconium-stained amniotic fluid                  | 29 (10%)                                  | 46 (17%)                     |

**Table S3.** Demographics of MCID survey respondents.

|            |                                                                   | <b>All women (n = 650)</b>                    |
|------------|-------------------------------------------------------------------|-----------------------------------------------|
| Experience | I am or have been pregnant and have been diagnosed with ICP       | 450 (73%)                                     |
|            | I am or have been pregnant but have never been diagnosed with ICP | 153 (25%)                                     |
|            | Neither of the above                                              | 17 (3%)                                       |
|            |                                                                   | <b>Women with experience of ICP (n = 450)</b> |
| Age        | 18–24                                                             | 26 (6%)                                       |
|            | 25–34                                                             | 228 (51%)                                     |
|            | 35–44                                                             | 176 (39%)                                     |
|            | 45–54                                                             | 17 (4%)                                       |
|            | 55+                                                               | 3 (1%)                                        |
|            |                                                                   | <b>Clinicians (n = 116)</b>                   |
| Age        | 18–24                                                             | 1 (1%)                                        |
|            | 25–34                                                             | 16 (14%)                                      |
|            | 35–44                                                             | 48 (41%)                                      |
|            | 45–54                                                             | 39 (34%)                                      |
|            | 55–64                                                             | 11 (9%)                                       |
|            | 65+                                                               | 1 (1%)                                        |
| Gender     | Female                                                            | 95 (82%)                                      |
|            | Male                                                              | 20 (17%)                                      |
|            | Other                                                             | 1 (1%)                                        |

**Table S4.** Sensitivity analysis excluding women whose adherence to the intervention was less than 90% of trial medication taken, consistently reported.

|                                                                                      | <b>UDCA<br/>(n = 205)</b> | <b>Placebo<br/>(n = 181)</b> | <b>Adjusted effects estimate<br/>(95% CI), p value</b> | <b>Interaction<br/>test</b> |
|--------------------------------------------------------------------------------------|---------------------------|------------------------------|--------------------------------------------------------|-----------------------------|
| <b>Bile acid concentration, all women, N</b>                                         | 195                       | 173                          |                                                        |                             |
| Bile acid concentration ( $\mu\text{mol/L}$ ),<br>geometric mean (SD)                | 22.2 (2.3)                | 17.9 (2.7)                   | GMR 1.20 (1.01 to 1.42)<br>p = 0.036                   |                             |
| <b>Baseline bile acid conc. &lt;40 <math>\mu\text{mol/L}</math>, N</b>               | 152                       | 135                          |                                                        |                             |
| Bile acid concentration ( $\mu\text{mol/L}$ ),<br>geometric mean (SD)                | 19.3 (2.2)                | 15.6 (2.5)                   | GMR 1.20 (1.00 to 1.45)<br>p = 0.055                   | p = 0.718                   |
| <b>Baseline bile acid conc. <math>\geq</math>40 <math>\mu\text{mol/L}</math>, N</b>  | 43                        | 38                           |                                                        |                             |
| Bile acid concentration ( $\mu\text{mol/L}$ ),<br>geometric mean (SD)                | 36.5 (2.0)                | 29.6 (2.9)                   | GMR 1.20 (0.81 to 1.77)<br>p = 0.369                   |                             |
| <b>Baseline bile acid conc. &lt;100 <math>\mu\text{mol/L}</math>, N</b>              | 183                       | 166                          |                                                        |                             |
| Bile acid concentration ( $\mu\text{mol/L}$ ),<br>geometric mean (SD)                | 21.3 (2.2)                | 17.2 (2.6)                   | GMR 1.22 (1.03 to 1.46)<br>p = 0.025                   | p = 0.417                   |
| <b>Baseline bile acid conc. <math>\geq</math>100 <math>\mu\text{mol/L}</math>, N</b> | 12                        | 7                            |                                                        |                             |
| Bile acid concentration ( $\mu\text{mol/L}$ ),<br>geometric mean (SD)                | 43.5 (2.3)                | 51.1 (2.6)                   | GMR 0.90 (0.40 to 2.01)<br>p = 0.793                   |                             |
| <b>Itch score, all women, N</b>                                                      | 191                       | 168                          |                                                        |                             |
| Itch score (mm), mean (SD)                                                           | 49.7 (25.5)               | 55.6 (26.7)                  | MD -4.65 (-9.50 to 0.19)<br>p = 0.060                  |                             |
| <b>Baseline itch score &lt;60 mm, N</b>                                              | 86                        | 67                           |                                                        |                             |
| Itch score (mm), mean (SD)                                                           | 40.7 (24.3)               | 44.9 (24.1)                  | MD -4.81 (-11.95 to 2.34)<br>p = 0.189                 | p = 0.975                   |
| <b>Baseline itch score <math>\geq</math>60 mm, N</b>                                 | 105                       | 101                          |                                                        |                             |
| Itch score (mm), mean (SD)                                                           | 57.2 (24.1)               | 62.6 (26.0)                  | MD -4.46 (-11.22 to 1.94)<br>p = 0.168                 |                             |
| <b>Baseline bile acid conc. &lt;40 <math>\mu\text{mol/L}</math>, N</b>               | 151                       | 134                          |                                                        |                             |
| Itch score (mm), mean (SD)                                                           | 50.3 (26.0)               | 55.3 (26.5)                  | MD -4.05 (-9.46 to 1.35)<br>p = 0.143                  | p = 0.668                   |
| <b>Baseline bile acid conc. <math>\geq</math>40 <math>\mu\text{mol/L}</math>, N</b>  | 40                        | 34                           |                                                        |                             |
| Itch score (mm), mean (SD)                                                           | 47.6 (23.6)               | 56.5 (27.5)                  | MD -6.92 (-17.93 to 4.09)<br>p = 0.222                 |                             |
| <b>Baseline bile acid conc. &lt;100 <math>\mu\text{mol/L}</math>, N</b>              | 182                       | 162                          |                                                        |                             |
| Itch score (mm), mean (SD)                                                           | 49.8 (25.6)               | 55.9 (26.4)                  | MD -5.08 (-9.93 to -0.22)<br>p = 0.041                 | p = 0.257                   |
| <b>Baseline bile acid conc. <math>\geq</math>100 <math>\mu\text{mol/L}</math>, N</b> | 9                         | 6                            |                                                        |                             |
| Itch score (mm), mean (SD)                                                           | 49.1 (24.0)               | 47.5 (34.5)                  | MD -8.07 (-40.92 to 24.78)<br>p = 0.639                |                             |
